# Supplementary material
Source: publisher site journal article supplement (https://www.dovepress.com/article/403252)
Supplement: Supplementary file 1 [file get_supplementary_file.php]

Supplementary material

# RESULTS

**Table S1** Modelling of the RIS for mode and frequency of treatment administration for patients

| Variable | Estimate | P-value |
| --- | --- | --- |
| Age at schizophrenia diagnosis | -0.06 | 0.04 |
| Use of subsistence allowance to cover medicine cost |  |  |
| Not using subsistence allowance to cover medicine cost | -1.22 | 0.02 |
| Using subsistence allowance to cover medicine cost (reference) | 0 | . |

**Table S2** Modelling of the RIS for mode and frequency of treatment administration for caregivers

| Variable | Estimate | P-value |
| --- | --- | --- |
| Age of caregiver | 0.04 | 0.01 |

**Table S3** Modelling of the RIS for hospital admission frequency for patients

| Variable | Estimate | P-value |
| --- | --- | --- |
| Employment status |  |  |
| Full-time | 0.97 | 0.00 |
| Part-time | 0.37 | 0.63 |
| Unemployed (reference) | 0 | . |
| Use of own expenses to cover medicine cost |  |  |
| Not using own expenses to cover medicine cost | 0.69 | 0.06 |
| Using own expenses to cover medicine cost (reference) | 0 | . |

**Table S4** Modelling of the RIS for hospital admission frequency for caregivers

| Variable | Estimate | P-value |
| --- | --- | --- |
| Basic medical insurance of patient |  |  |
| Has a basic medical insurance and uses it for reimbursement | -1.25 | 0.08 |
| Has a basic medical insurance, but doesn’t use it for reimbursement | -2.04 | 0.03 |
| Doesn’t have a basic medical insurance (reference) | 0.00 | . |
| Use of subsistence allowance to cover medicine cost |  |  |
| Not using subsistence allowance to cover medicine cost | 1.07 | 0.01 |
| Using subsistence allowance to cover medicine cost (reference) | 0 | . |

**Table S5** Modelling of the RIS for improvement in positive symptoms for patients

| Variable | Estimate | P-value |
| --- | --- | --- |
| No variables were retained in the final model |  |  |

**Table S6** Modelling of the RIS for improvement in positive symptoms for caregivers

| Variable | Estimate | P-value |
| --- | --- | --- |
| Living with patient |  |  |
| Not living with patient | 1.22 | 0.00 |
| Living with patient (reference) | 0.00 | . |
| Patient family income |  |  |
| Less than 79,566 yuan/year | -0.27 | 0.04 |
| Between 79,567 and 92,199 yuan/year | 0.06 | 0.64 |
| More than 92,200 yuan/year (reference) | 0.00 | . |
| Patient using own expenses |  |  |
| No | -0.29 | 0.06 |
| Yes (reference) | 0.00 | . |

**Table S7**: Modelling of the RIS for treatment cost for patients

| Variable | Estimate | P-value |
| --- | --- | --- |
| No variables were retained in the final model |  |  |

**Table S8** Modelling of the RIS for treatment cost for caregivers

| Variable | Estimate | P-value |
| --- | --- | --- |
| Gender of caregiver |  |  |
| Female | -0.14 | 0.03 |
| Male | 0.00 | . |
| Patient family income |  |  |
| Less than 79,566 yuan/year | 0.20 | 0.01 |
| Between 79,567 and 92,199 yuan/year | 0.01 | 0.94 |
| More than 92,200 yuan/year (reference) | 0.00 | . |

**Table S9**: Modelling of the RIS for improvement in daily activities for patients

| Variable | Estimate | P-value |
| --- | --- | --- |
| Having received another treatment |  |  |
| No | -0.37 | 0.00 |
| Yes (reference) | 0.00 | . |
| Using own expenses |  |  |
| No | -0.24 | 0.00 |
| Yes (reference) | 0.00 | . |

**Table S10** Modelling of the RIS for improvement in daily activities for caregivers

| Variable | Estimate | P-value |
| --- | --- | --- |
| Age of the patient | 0.01 | 0.10 |
| Employment status of the patient |  |  |
| Full-time | -0.06 | 0.45 |
| Part-time | -0.47 | 0.03 |
| Unemployed (reference) | 0.00 | . |
| Patient family income |  |  |
| Less than 79,566 yuan/year | -0.19 | 0.03 |
| Between 79,567 and 92,199 yuan/ year | -0.17 | 0.05 |
| More than 92,200 yuan/year (reference) | 0.00 | . |

**Table S11** Modelling of the RIS for improvement in social activities for patients

| Variable | Estimate | P-value |
| --- | --- | --- |
| No variables were retained in the final model |  |  |

**Table S12** Modelling of the RIS for improvement in social activities for caregivers

| Variable | Estimate | P-value |
| --- | --- | --- |
| Number of years the caregiver has been taking care of patient | -0.02 | 0.07 |
